# Supplementary material for: Selectivity promotion of Cu by manganese oxide in hydrogenative ring opening of furfural to pentanediols
Source: Royal Society of Chemistry journal article supplement (doi:10.1039/d4cc05247a), 2024-12-13
Supplement: d4cc05247a1.pdf [file d4cc05247a1.pdf]

## Supplementary Information

### 1. Experimental

#### 1.1 Chemicals

All the reagents used were of analytical grade, purchased locally and used without any purification unless otherwise specified. Furfural (Sinopharm Chemical Reagent Co., Ltd, 99.9%), furfuryl alcohol (Aladdin Reagent, 98%), 1, 2-pentanediol (Aladdin Reagent, 98%), 1, 5-pentanediol (Aladdin Reagent, 98%), methyl furan (Aladdin Reagent, 98%), 2-propanol (Kermel, 99%), tetrahydrofurfuryl alcohol (Aladdin Reagent, >98%), 1-pentanol (Aladdin Reagent, 98%), Cu powder (Macklin, 99.9%, 60-100 nm), CuAl alloy (Jiangsu Raney Metal Technology Co., LTD), Ammonium metatungstate (Aladdin Reagent, 99.5%), Tin (II) acetate (Energy chemical, 97%), AlOOH (Sinopharm Chemical Reagent Co., Ltd, 99.9%), Octane (Macklin, >99.9 (GC)).

#### 1.2 Catalyst preparation

Metal oxides ( $\text{MnO}_2$ ,  $\text{WO}_3$ ,  $\text{MoO}_3$ ,  $\text{SnO}_2$ ,  $\text{Al}_2\text{O}_3$ ) modified Cu powder catalysts were prepared through a simple impregnation method. Specifically, a certain amount of metal precursor was dissolved in 50 g deionized water upon adding Cu powder. The mixture was stirred for about 3 h under  $\text{N}_2$  atmosphere at 298 K. Excess water was removed with a rotary evaporator under reduced pressure at 333 K. The obtained solid was dried at 393 K overnight under reduced pressure, calcined at 723 K for 4 h under  $\text{N}_2$ . The loading of metal oxide was about 1.0 wt%.

$\text{MnO}_2$  modified Cu catalyst ( $\text{MnO}_2/\text{Cu}$ ) was prepared by two steps: (1) loading  $\text{MnO}_2$  on CuAl alloy through simple impregnation and calcination processes; (2) leaching Al in  $\text{MnO}_2/\text{CuAl}$  (about 60  $\mu\text{m}$ , Cu:Al = 1:2) with 30 wt% NaOH solution at 50 °C. About 30 ml NaOH solution was used for leaching Al from 4 g  $\text{MnO}_2/\text{CuAl}$  in 70 min. The leaching rate of Al was carefully controlled through controlling the dropping rate of NaOH solution. Specifically, 0.3 ml/min NaOH solution was dropped into the solution containing  $\text{MnO}_2/\text{CuAl}$  in the initial 30 min. After the leaching process, the catalyst was washed several times with deionized water to remove residual soluble Al compounds in the liquid until the pH value reaches 7.0. Finally, the prepared sample  $\text{MnO}_2/\text{Cu}$  was stored in isopropanol (IPA).

### 1.3 Catalytic reaction and catalyst recycling

The hydrogenation of furfural and other reactants was carried out in a 10 mL Teflon-lined stainless-steel autoclave. Reactants, furfural and furfuryl alcohol were first purified through distillation under reduced pressure at about 100 °C. The purified reactants are used for the subsequent quantification and transformation. Specifically, 85 mg catalyst, 2 ml isopropanol (IPA) and 0.5 g reactant were added to the autoclave. Then the autoclave was sealed and filled with 4.5 MPa H<sub>2</sub> upon purging with H<sub>2</sub> eight times. During the reaction, the temperature was maintained at 170 °C and the stirring rate was 500 rpm. After the reaction, a specific amount of diluent IPA (about 20 ml) and internal standard octane (about 100 mg) was added for quantification. Reusability test of catalyst was conducted under the same procedures above. After each reaction run, the catalyst was recovered, washed with isopropanol and centrifuged for five times before the next reaction. The liquid product was analyzed by off-line gas chromatography (Agilent, 7890A) using a FID detector and a HP-5 capillary column (0.32 mm×30 m×0.25 μm). The conversion of reactants and selectivity of the liquid product were calculated by the following equations (1) and (2).

$$(1) \text{ Conversion \%} = \frac{\text{moles of reactant converted} * 100\%}{\text{initial moles of reactant}}$$

$$(2) \text{ Yield \%} = \frac{\text{carbon moles of one specific product} * 100\%}{\text{initial moles of reactant}}$$

### 1.4 Characterization Details

The surface composition and the binding energy (B.E.) of the catalysts were determined by X-ray photoelectron spectra (XPS) on an ESCALAB250 X-ray photoelectron spectrometer with carbon as the internal standard (C 1s = 284.6 eV). The surface atomic ratio of Cu<sup>+</sup> to Cu on the catalyst MnO<sub>2</sub>/Cu was calculated by using the equation (3).

$$(3) \frac{n_i}{n_j} = \frac{I_i}{I_j} \times \frac{\sigma_j}{\sigma_i} \times \frac{E_{k_j}^{0.6}}{E_{k_i}^{0.6}} ; n: \text{Number of atoms}; I: \text{Intensity}; E_k: \text{Kinetic energy}; \sigma: \text{cross section.}$$

Powder XRD patterns of the samples were acquired on a X'Pert PRO (PANalytical) diffractometer equipped with a Cu K $\alpha$  radiation source ( $\lambda = 0.15432$  nm) operated at 40 kV and 40 mA, in the  $2\theta$  range from 5° to 80°.

High-resolution transmission electron micrographs (HRTEM) of samples were obtained on a JEM-2100 microscope operated at 200 kV. The scanning electron micrograph (SEM) was obtained on a field emission scanning electron microscope (FESEM, JEOL, JSM-7800F, 15 kV). Sub-ångström resolution HAADF-STEM images and energy-dispersive X-ray spectroscopy (EDX) elemental mapping were obtained on a JEOLJEM-ARM200F STEM/TEM, also equipped with a CEOS probe corrector, at a resolution of 0.08 nm. Before microscopy examination, the samples were suspended in ethanol and dispersed onto a copper grid or carbon film.

An infrared diffuse reflectance accessory was used for the infrared (IR) measurements. The accessory was purchased from Pike Technologies. The middle-IR instrument model is Thermo Scientific Nicolet iS50 with mercury cadmium telluride (MCT) detector. The resolution is 4 cm<sup>-1</sup> for the IR experiment, which was measured using 32 scans. The samples were pretreated at 40 °C for 2 h under Ar atmosphere (30 cm<sup>3</sup> min<sup>-1</sup>). About 30 mg of furfuryl alcohol solution (10 wt%) in CH<sub>3</sub>CN was dropped on the sample. The infrared spectra of furfuryl alcohol adsorbed on catalysts were collected at 40 °C upon removing CH<sub>3</sub>CN and weakly adsorbed furfuryl alcohol at 40 °C for about 30 min under Ar atmosphere (30 cm<sup>3</sup> min<sup>-1</sup>).

## 2. Supporting results

Table S1. Catalytic performance of furfural and FA hydrodeoxygenation over non-noble metal catalysts in literature and this work

| Catalyst                                            | Conditions                | Conv. %                        | Yield %  |          |      |      |        |      |
|-----------------------------------------------------|---------------------------|--------------------------------|----------|----------|------|------|--------|------|
|                                                     |                           |                                | 1, 5-PeD | 1, 2-PeD | MF   | THFA | Others |      |
| 10Cu-LaCoO <sub>3</sub> <sup>1</sup>                | 1.1 g cat. 1.5 g FA       | 140 °C, 6MPa, 2 h              | 94.6     | 36.9     | 13.9 | -    | 33.7   | 15.5 |
| 10Cu/Al <sub>2</sub> O <sub>3</sub> <sup>2</sup>    | 2g cat. 0.4 g FA          | 140 °C, 6 MPa, 8 h             | 60.4     | 13.7     | 29.4 | 6.0  | 2.2    | 8.9  |
| Cu <sub>1.8</sub> Mg <sub>1.2</sub> Al <sup>3</sup> | 40 mg cat. 0.2 g Furfural | 140 °C, 4 MPa, 3h              | 100      | 5.3      | 24.4 | 0    | 1.6    | 50.8 |
| CoAl-spinel nanoparticles <sup>4</sup>              | 40 mg cat. 0.4g Furfural  | 150°C, 3 MPa H <sub>2</sub> 8h | 100      | 29.8     | 0    | 0    | 0      | 69.3 |
|                                                     |                           | 170°C, 2 MPa H <sub>2</sub> 8h | 100      | 14.4     | 8.7  | 0    | 0      | 33.5 |
| Raney Cu <sup>5</sup>                               | 85 mg cat. 0.5 g Furfural | 170 °C, 4.5 MPa, 6h            | 100      | 0        | 34.1 | 34.6 | 8.6    | 22.6 |
| MnO <sub>2</sub> /Cu <sup>#</sup>                   | 85 mg cat. 0.5 g FA       | 170 °C, 4.5 MPa, 6h            | 81.1     | 10.6     | 39.7 | 11.6 | 7.7    | 11.5 |
|                                                     |                           | 170 °C, 6 MPa, 6h              | 100      | 11.1     | 42.9 | 7.9  | 6.7    | 6.8  |

<sup>#</sup> MnO<sub>2</sub>/Cu catalyst prepared in this work

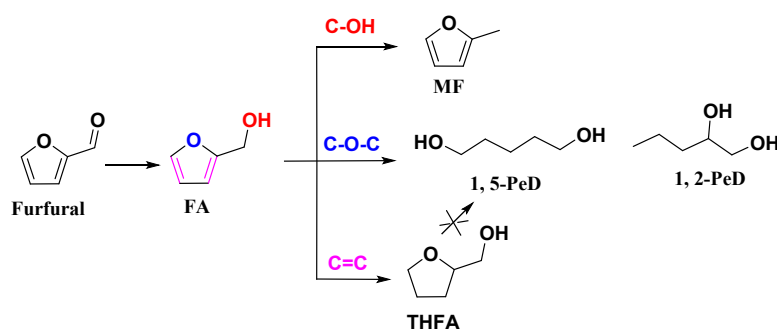

Scheme 1 Reaction pathways of furfural hydrogenation over MnO<sub>2</sub>/Cu catalyst

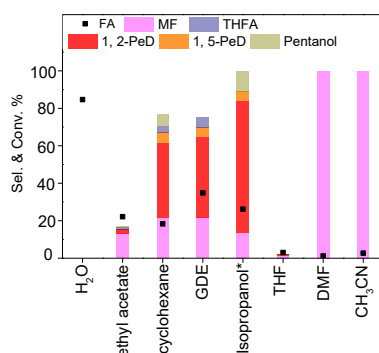

Figure S1 Catalytic performance of the hydrogenation of furfural alcohol in several solvents. GDE is the abbreviation of glycol dimethyl ether. DMF is the abbreviation of N, N-dimethyl formamide. THF is the abbreviation of tetrahydrofuran. Reaction conditions: Catalyst 160 mg, FA 0.5 g, solvent 2 ml, 160 °C, 5.5 h, 4 MPa H<sub>2</sub>, \*170 °C, Catalyst 85 mg, 3 h, 4.5 MPa H<sub>2</sub>.

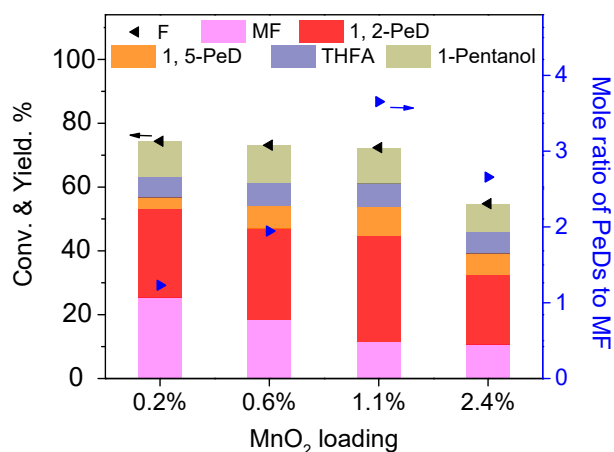

Figure S2 Catalytic performance of FA hydrogenation over Cu based catalysts with different MnO<sub>2</sub> loading. Catalyst 85 mg, FA 0.5 g, IPA 2 ml, 4.5 MPa H<sub>2</sub>, 170 °C, 3 h.

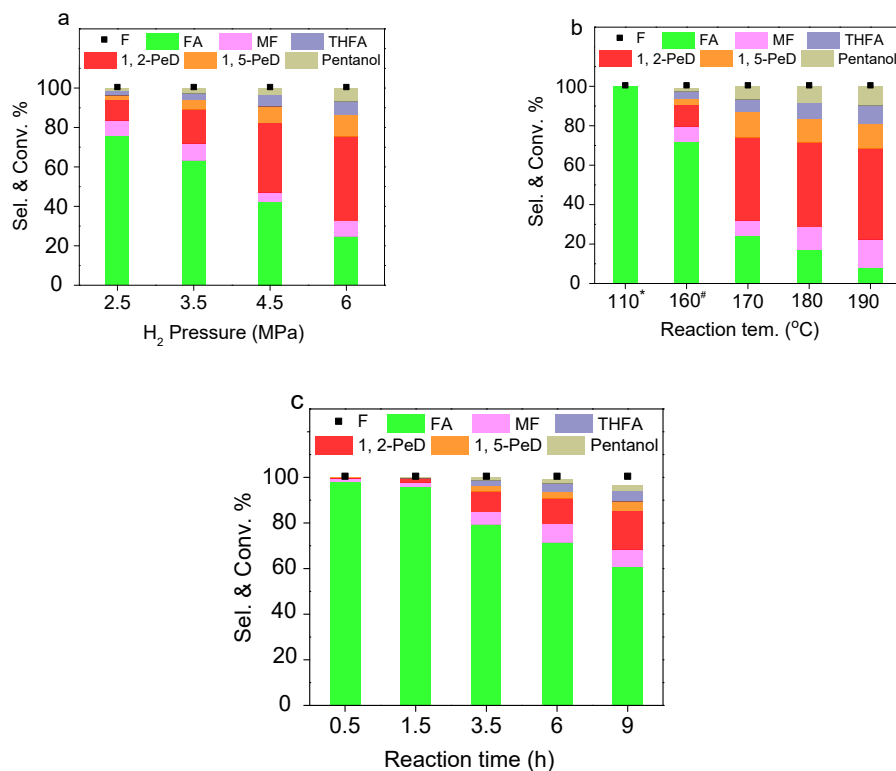

Figure S3 Catalytic performance of furfural (F) hydrogenation over MnO<sub>2</sub>/Cu catalyst (a) under different H<sub>2</sub> pressure (reaction condition: Catalyst 85 mg, F 0.5 g, IPA 2 ml, 170 °C, 6 h); (b) at different reaction temperature (reaction condition: Catalyst 85 mg, F 0.5 g, IPA 2 ml, 6 MPa, 6 h. \*4.5 MPa, 2 h, #4 MPa); and (c) at different reaction time (reaction condition: Catalyst 73 mg, F 0.5 g, IPA 2 ml, 4 MPa, 160 °C.)

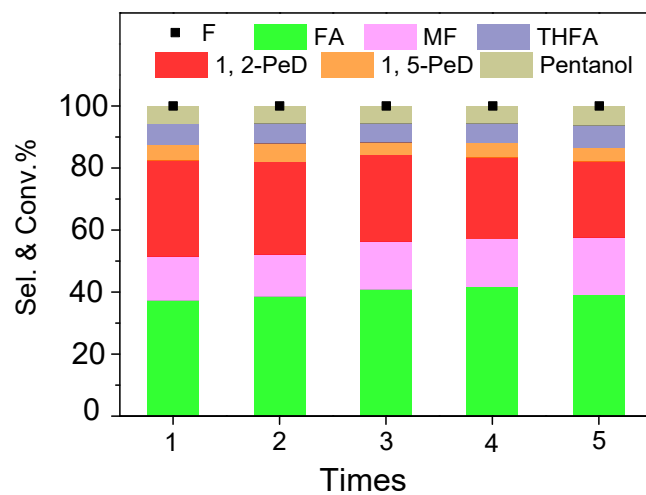

Figure S4 The conversion and product distribution in furfural hydrogenation over the  $\text{MnO}_2/\text{Cu}$  catalyst in five successive runs. Reaction conditions:  $\text{MnO}_2/\text{Cu}$  catalyst 85 mg, 0.5 g furfural (F), isopropanol 1.6 g, 170 °C, 4.5 MPa  $\text{H}_2$ , 6 h

Table S2 Hydrogenation of furan derived compounds over Cu based catalysts

| Entry | Catal.                                    | Feed     | Conv. % | Sel. % |      |          |          |        | Mole Ratio (PeDs : MF) |
|-------|-------------------------------------------|----------|---------|--------|------|----------|----------|--------|------------------------|
|       |                                           |          |         | FA     | MF   | 1, 2-PeD | 1, 5-PeD | Others |                        |
| 1     | MnO <sub>2</sub> /Cu powder               | FA       | 25.7    | --     | 13.5 | 70.4     | 4.9      | 11.1   | 5.60                   |
| 2     | WO <sub>3</sub> /Cu powder                | FA       | 100     | --     | 62.4 | 0        | 0        | --     | 0                      |
| 3     | MoO <sub>3</sub> /Cu powder               | FA       | 36.1    | --     | 22.8 | 10.4     | 0        | 0      | 0.46                   |
| 4     | SnO <sub>2</sub> /Cu                      | Furfural | 99.3    | 78.1   | 16   | 4.3      | 0        | 0      | 0.27                   |
| 5     | Al <sub>2</sub> O <sub>3</sub> /Cu powder | FA       | 14.3    | --     | 10.1 | 4.2      | 0        | 0      | 0.41                   |

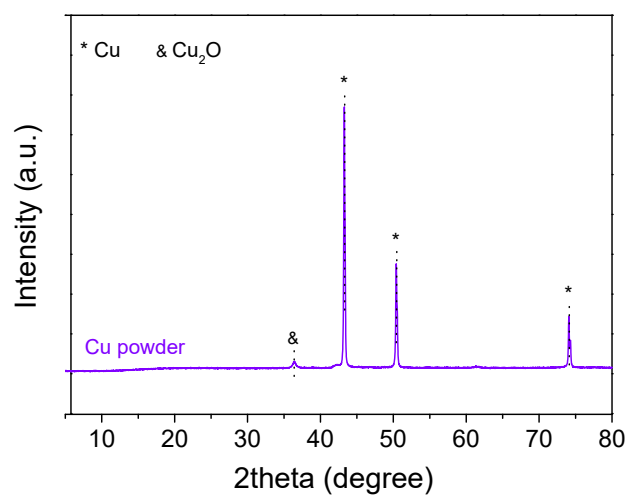

Figure S5 XRD patterns of Cu powder

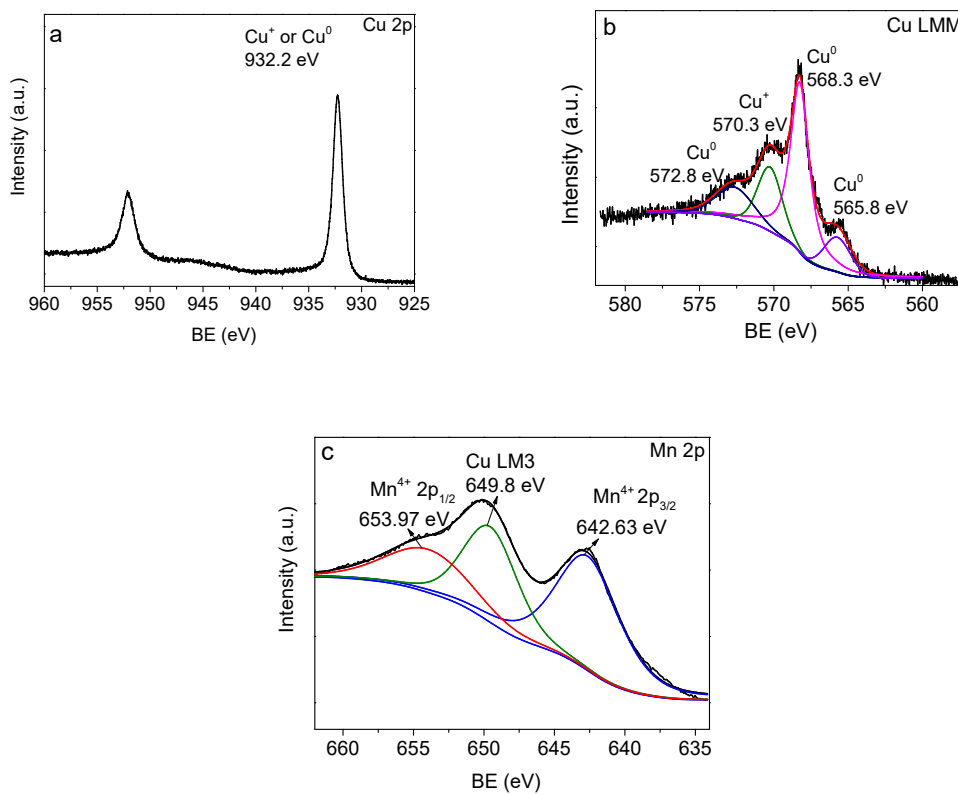

Figure S6. X-ray photoelectron spectra of MnO<sub>2</sub>/Cu catalyst surface. (a) Cu2p spectrum; (b) Peak fitting of the Cu LMM spectrum; (c) Mn2p spectrum. BE is the abbreviation for binding energy.

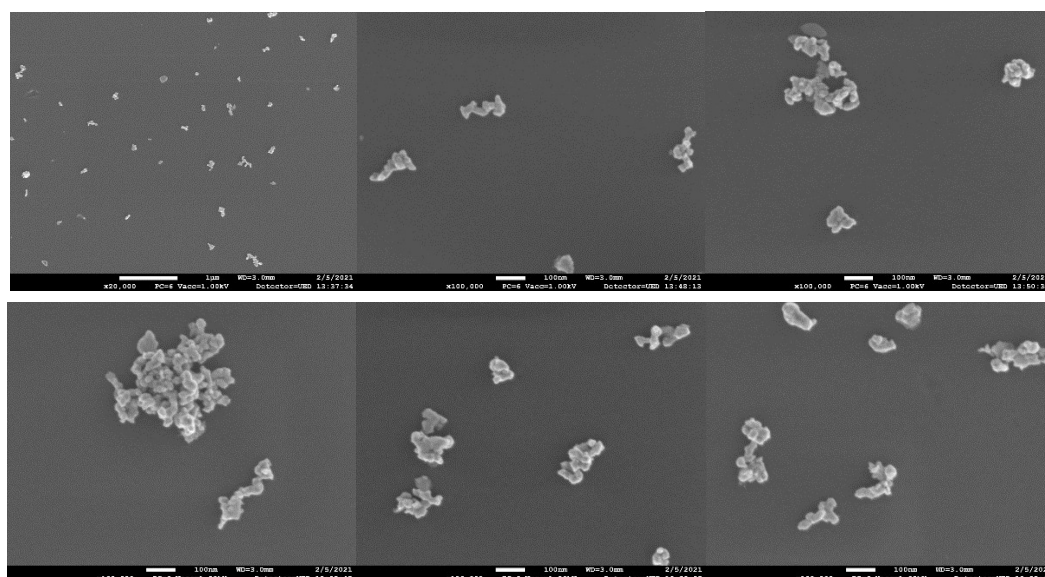

Figure S7 SEM images of MnO<sub>2</sub>/Cu catalyst



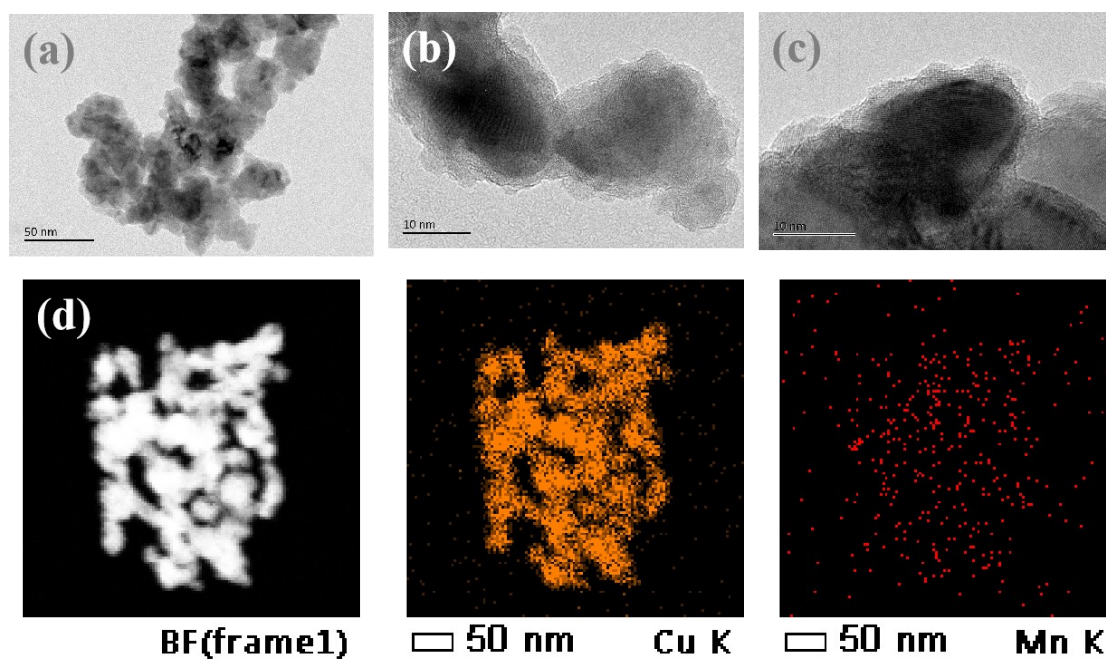

Figure S8 HAADF-STEM images and EDX mapping images of MnO<sub>2</sub>/Cu catalyst

## Reference

- 1 F. Gao, H. Liu, X. Hu, J. Chen, Z. Huang and C. Xia, *Chin. J. Catal.*, 2018, **39**, 1711–1723.
- 2 H. Liu, Z. Huang, H. Kang, C. Xia, and J. Chen, *Chin. J. Catal.*, 2016, **37**, 700–710.
- 3 Y. Shao, J. Wang, H. Du, K. Sun, Z. Zhang, L. Zhang, Q. Li, S. Zhang, Q. Liu and X. Hu, *ACS Sus. Chem. Eng.*, 2020, **8**, 5217-5228.
- 4 L. Gavilà, A. Lähde, J. Jokiniemi, M. Constanti, F. Medina, E. Río, D. Tichit and M.G. Álvarez, *ChemCatChem*, 2019, **11**, 4944-4953.
- 5 H. Li, X. Nie, H. Du, Y. Zhao, J. Mu and Z.C. Zhang, *ChemSusChem*, 2023, DOI: 10.1002/cssc.202300880.
